# Supplementary material
Source: PubMed Central journal article supplement (PMC5888397)
Supplement: fj.201700770R.sf1.pdf [file fj.201700770R.sf1.pdf]

After lymphocyte and single-cell gating:

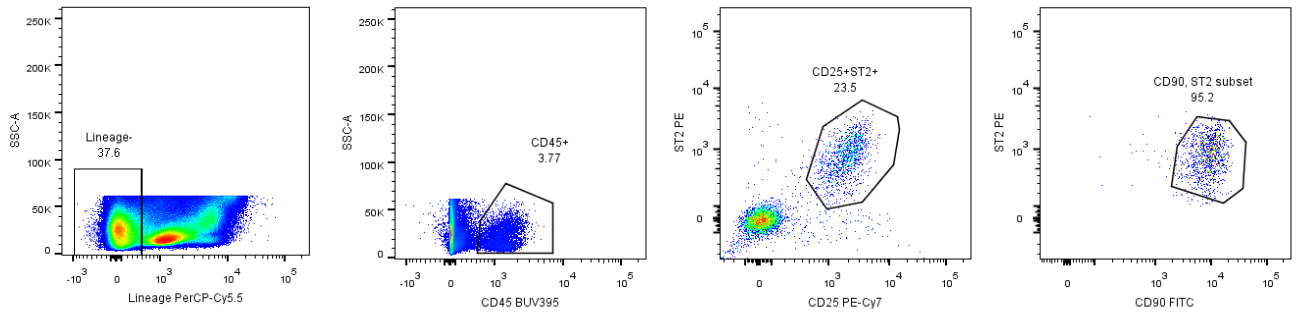

### Supplementary Figure 1: Gating strategy for ILC2 cells

For bone marrow ILC2 sorting, cells were stained for lineage markers (CD3 $\epsilon$ , CD5, CD11b, CD11c, CD19, NK1.1, TCR  $\gamma\delta$ , B220) and further stained for CD45, CD25, CD127, and **ST-2**. After lymphocyte and singlet gates, ILC2 cells were sorted as Lin<sup>-</sup> CD45<sup>+</sup> CD25<sup>+</sup> CD127<sup>+</sup> **ST-2**<sup>+</sup> cells. For lung ILC2 cells, CD90.2 was used as an additional positive marker.
